# Supplementary material for: Electrical Stimuli Release ATP to Increase GLUT4 Translocation and Glucose Uptake via PI3Kγ-Akt-AS160 in Skeletal Muscle Cells
Source: PubMed Central journal article supplement — Diabetes. 2013 Apr 16;62(5):1519–26. doi: 10.2337/db12-1066 (PMC3636621; doi:10.2337/db12-1066), 2013-04-16

SUPPLEMENTARY DATA

**Supplementary Figure 1.** (A) ATP dose response for 2-NBDG uptake. (B) 100 nM insulin and 100  $\mu$ M ATP stimulated 2-NBDG uptake were measured in myotubes maintained in DMEM (10 mM glucose) or  $\alpha$ -MEM (5.5 mM Glucose) medium. (C) Myotubes were stimulated with Insulin (100 nM), ATP (100  $\mu$ M), ADP (100  $\mu$ M) or UTP (100  $\mu$ M), then 2-NBDG uptake was assayed as indicated in *Experimental design and Methods*. Agonists of P2Y receptors ADP and UTP were stimulate 2-NBDG uptake (up 60 myotubes per condition). (D)  $^3$ H-2DG uptake was measured in myotubes as described in *Experimental design and Methods*, pre-treated with suramin (100  $\mu$ M) or in the presence of indinavir (100  $\mu$ M) in the transport solution. (E) Insulin (100 nM) and ATP (100  $\mu$ M) stimulation of  $^3$ H-2DG uptake. Cytochalasin B (10  $\mu$ M) added to the transport solution blocked  $^3$ H-2DG uptake in non-stimulated and insulin-stimulated cells. Values are the mean  $\pm$  SD. \*\* $p < 0.001$  vs basal group, †† $p < 0.001$ , †  $p < 0.01$  vs ATP-stimulated condition. Data from at least 5 independent experiments.

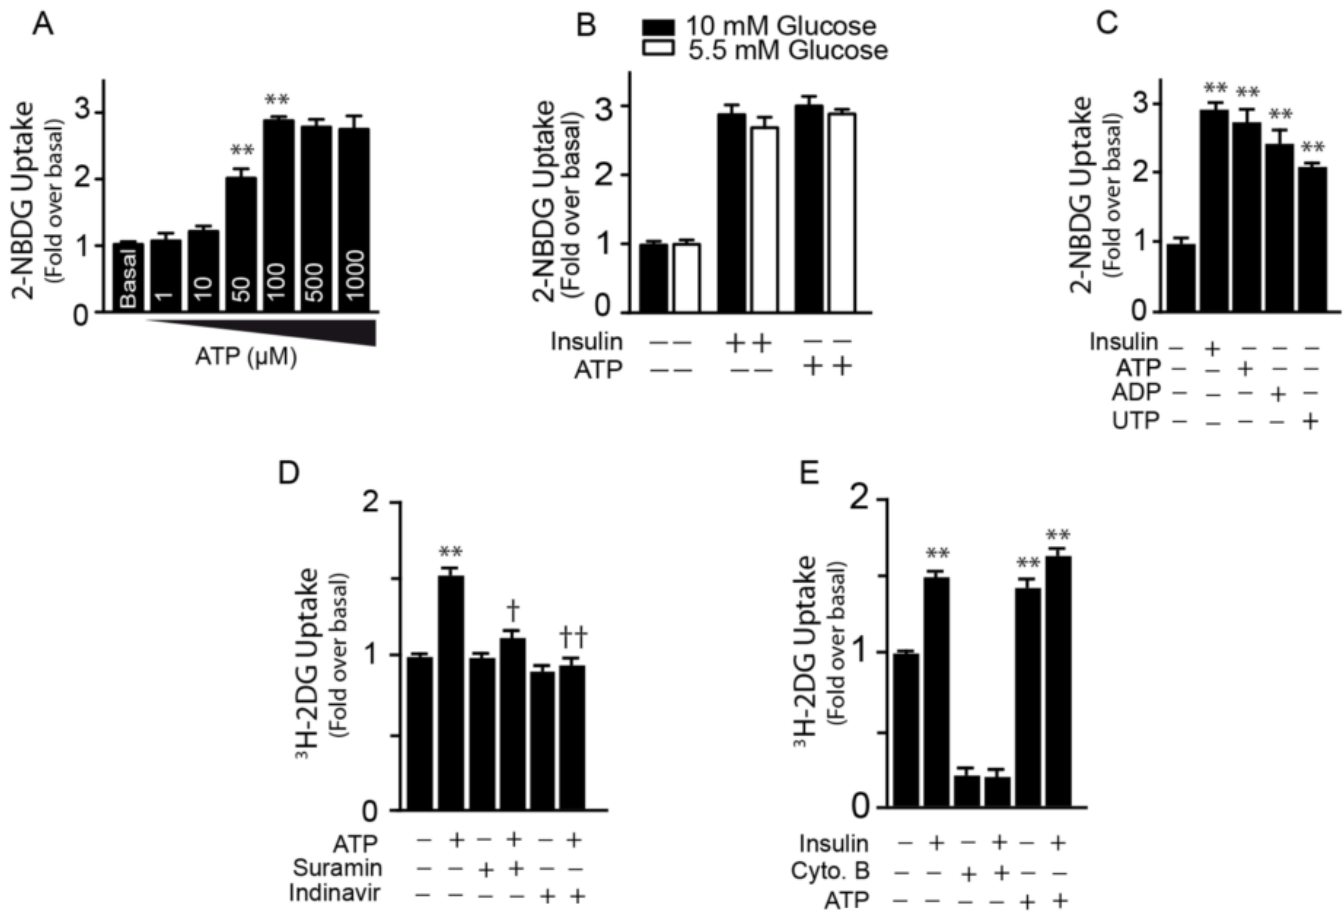

SUPPLEMENTARY DATA

**Supplementary Figure 2.** Myotubes were stimulated with ATP (100  $\mu$ M), or insulin (100 nM). **(A,B)** Representative immunoblots of pTyr1150/1151 insulin receptor and Akt phosphorylation at Ser 473. **(C)** 2-NBDG uptake assayed as indicated in *Experimental design and Methods* with indinavir (100  $\mu$ M) present in the uptake solution to inhibit GLUT4. **(D)** Pre-treatment with LY294002 (40  $\mu$ M) prior and during ATP stimulation followed by Akt phosphorylation in Ser473 phosphorylation. **(E)** Insulin-dependent 2-NBDG uptake was measured in myotubes pre-incubated for 30 min with apirase (2 U/ml) or suramin (100  $\mu$ M). Values are the mean  $\pm$  SD. \*\* $p < 0.001$ , \* $p < 0.01$  vs basal group, † $p < 0.01$  relative to the ATP-stimulated condition. Data from at least 4 independent experiments, 60 cells analyzed per condition.

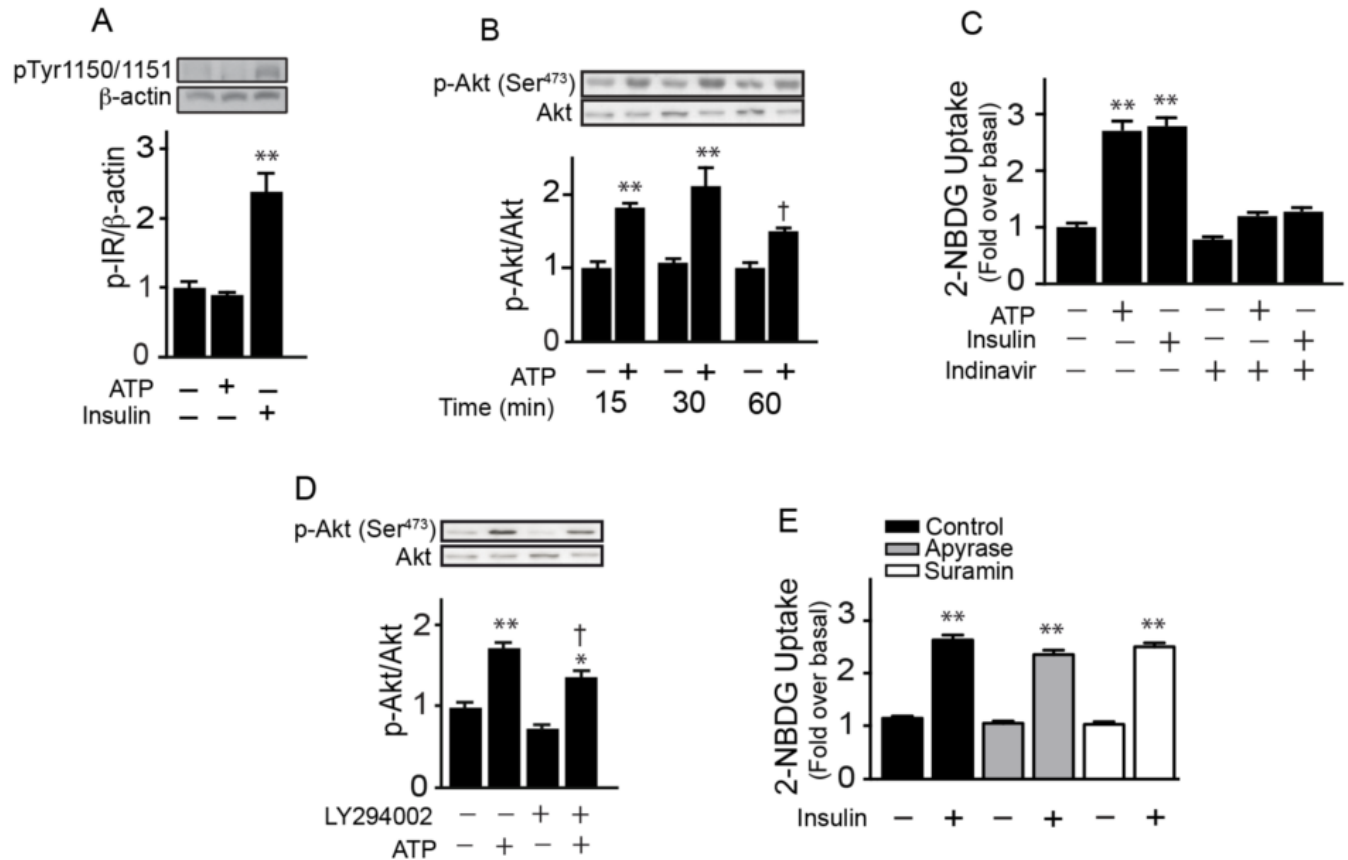

SUPPLEMENTARY DATA

**Supplementary Figure 3.** L6-GLUT4*myc* cells were stimulated with ATP (100  $\mu$ M) or insulin (100 nM). Extracellular exposure of the *myc* epitope was detected by immunofluorescence in non-permeabilized cells to quantify the exocytosis process as described in *Experimental design and Methods*. \*\* $p < 0.001$  Insulin or ATP vs basal group at the indicated times. Data from at least 3 independent experiments.

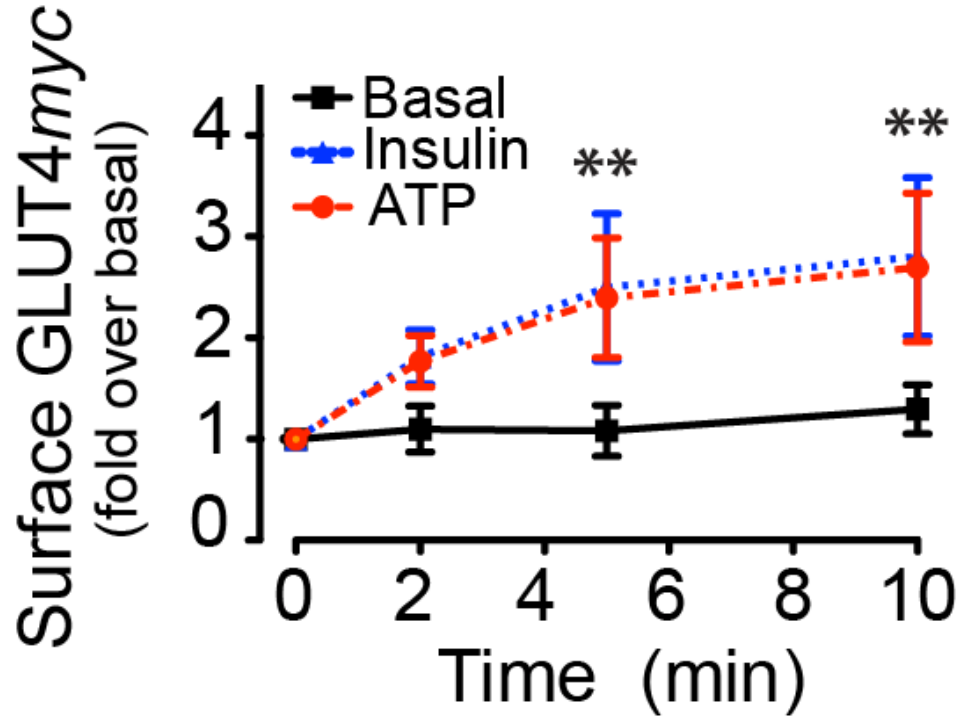

Supplement: supp_db12-1066_DB121066SupplementaryData.pdf [file supp_db12-1066_DB121066SupplementaryData.pdf]
